# Supplementary material for: Bifunctional 3D Cu-MOFs containing glutarates and bipyridyl ligands: selective CO2 sorption and heterogeneous catalysis
Source: Royal Society of Chemistry journal article supplement (doi:10.1039/c2dt31427d), 2012-01-01
Supplement: c2dt31427d.pdf [file c2dt31427d.pdf]

## Supporting Information

### ***Bifunctional 3D Cu-MOFs containing glutarates and bipyridyl ligands: selective CO<sub>2</sub> sorption and catalytic activity***

**In Hong Hwang,<sup>a</sup> Jeong Mi Bae,<sup>a</sup> Wan-Seok Kim,<sup>b</sup> Young Dan Jo,<sup>a</sup> Cheal Kim,<sup>\*a</sup>  
Youngmee Kim,<sup>\*c</sup> Sung-Jin Kim,<sup>c</sup> and Seong Huh<sup>\*b</sup>**

<sup>a</sup>*Department of Fine Chemistry, Seoul National University of Science & Technology, Seoul 139-743, Korea. E-mail: chealkim@seoultech.ac.kr; Fax: 82-2-973-9149; Tel: 82-2-970-6693*

<sup>b</sup>*Department of Chemistry and Protein Research Center for Bio-Industry, Hankuk University of Foreign Studies, Yongin 449-791, Korea. E-mail: shuh@hufs.ac.kr; Fax: 82-31-330-4566; Tel: 82-31-330-4522*

<sup>c</sup>*Department of Chemistry and Nano Science, Ewha Womans University, Seoul 120-750, Korea. E-mail: ymeekim@ewha.ac.kr; Fax: 82-2-3277-2384; Tel: 82-2-3277-3589*

**Table S1.** Recycle experiments for the MOF 1.

| Entry | Period (d) <sup>a</sup> | Conversion (%) |
|-------|-------------------------|----------------|
| 1     | 2                       | 100            |
| 2     | 2                       | 100            |
| 3     | 2                       | 100            |
| 4     | 2                       | 100            |
| 5     | 2                       | 100            |
| 6     | 2                       | 100            |
| 7     | 2                       | 100            |
| 8     | 2                       | 100            |
| 9     | 2                       | 100            |
| 10    | 2                       | 100            |
| 11    | 2                       | 100            |
| 12    | 2                       | 100            |
| 13    | 2                       | 100            |
| 14    | 2                       | 100            |
| 15    | 2                       | 100            |
| 16    | 2                       | 100            |
| 17    | 2                       | 100            |
| 18    | 2                       | 100            |
| 19    | 2                       | 100            |
| 20    | 2                       | 100            |

<sup>a</sup>The conversion was monitored by GC/Mass and the internal standard was dodecane.
